# Supplementary material for: Matrix-enhanced nanostructure initiator mass spectrometry (ME-NIMS) for small molecule detection and imaging
Source: Royal Society of Chemistry journal article supplement (doi:10.1039/c6ay02753a), 2016-01-01
Supplement: c6ay02753a1.pdf [file c6ay02753a1.pdf]

## Supporting Information

### **Matrix-Enhanced Nanostructure Initiator Mass Spectrometry (ME-NIMS) for Small Molecule Detection and Imaging**

Tara N. Moening, Victoria L. Brown<sup>†</sup>, and Lin He\*

Department of Chemistry, North Carolina State University, Raleigh, NC 27695

Submitted to *Analytical Methods* as a Technical Note

\*: Contact Author: [Lin\\_He@ncsu.edu](mailto:Lin_He@ncsu.edu)

<sup>†</sup>Current address: School of Law, Northeastern University, Boston, MA 02115

**Supporting Information Table S1:** A Summary of Experiment Conditions for NIMS, ME-SALDI, and ME-NIMS substrates.

|                                       | NIMS   |        | ME-SALDI |        | ME-NIMS  |        |
|---------------------------------------|--------|--------|----------|--------|----------|--------|
|                                       | n-type | p-type | n-type   | p-type | n-type   | p-type |
| Piranha clean                         | ✓      | ✓      | ✓        | ✓      | ✓        | ✓      |
| 5% HF wash                            | ×      | ×      | ×        | ×      | ×        | ×      |
| Etch time (min)                       | 30     | 30     | 30       | 30     | 30       | 30     |
| Current density (mA/cm <sup>2</sup> ) | 32     | 48     | 32       | 48     | 32       | 48     |
| Matrix sublimation (min)              | ×      | ×      | 1.5      | 1.5    | 1.5      | 1.5    |
| Initiator application (min)           | 30     | 30     | 30       | 30     | ×        | ×      |
| Storage                               | air    |        | ethanol* |        | ethanol* |        |

\*Prior to matrix deposition, ME-SALDI or ME-NIMS substrates are stored in ethanol to avoid surface oxidation. After sublimation, substrates are immediately analyzed in the instrument.

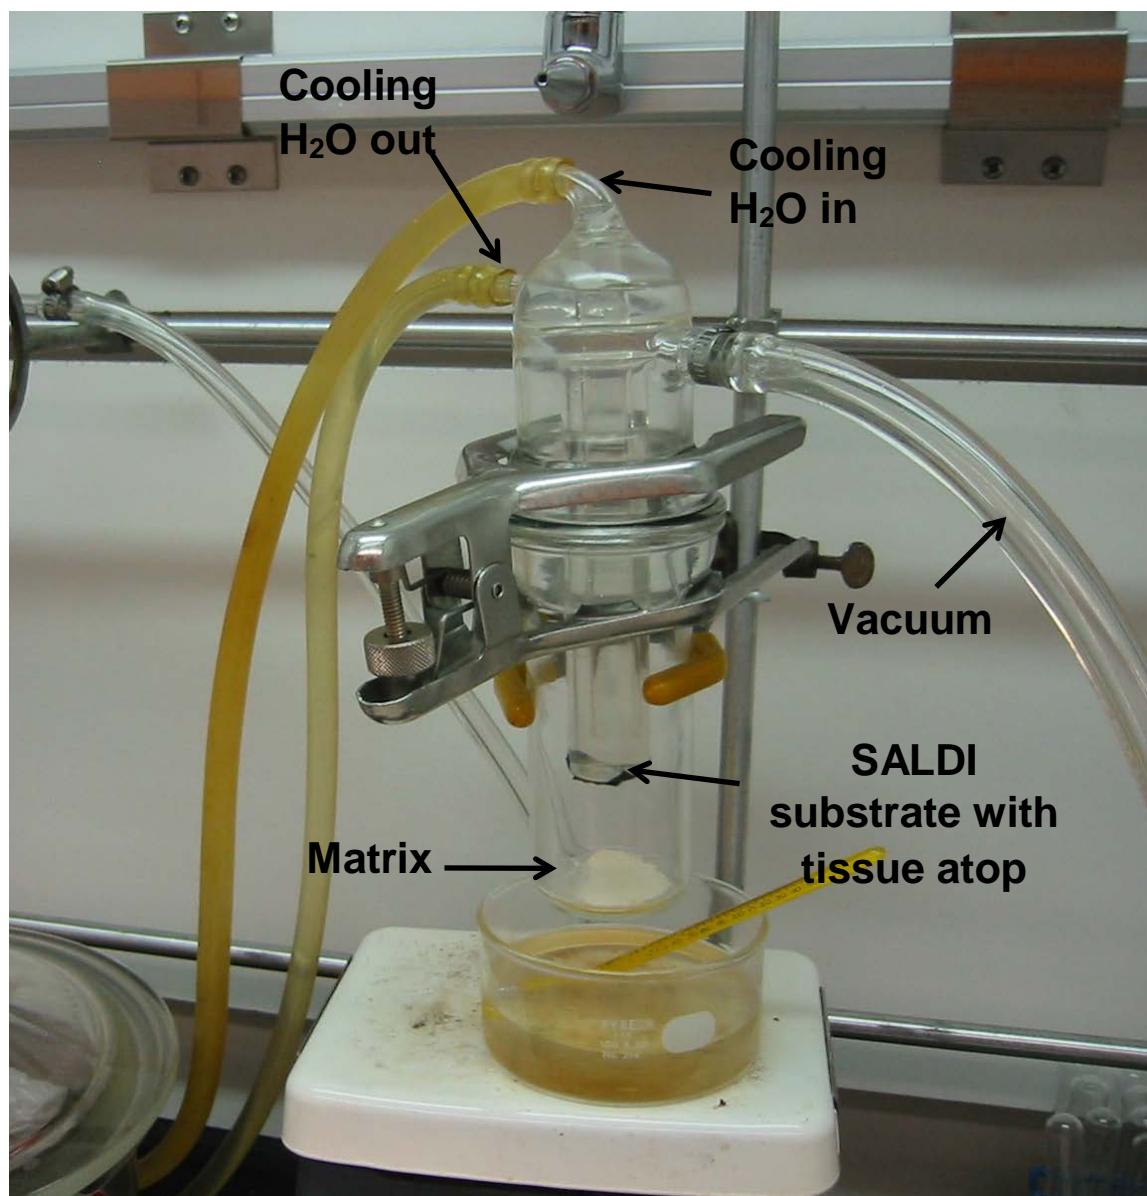

**Supporting Information Figure 1:** A photo picture of in-house sublimation apparatus.<sup>24</sup>

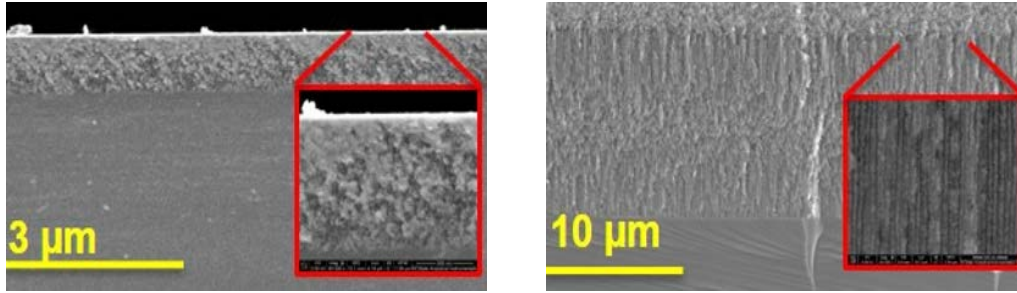

**Supporting Information Figure 2:** SEM images of cross-sections of SALDI (left) and NIMS (right). Insets display a zoomed in view of the porous channels. Closely packed high-aspect ratio pores are clearly seen in NIMS whereas the pores in SALDI (i.e. DIOS) are much more random and loosely packed.
